# Supplementary material
Source: publisher site journal article supplement (https://www.dovepress.com/article/351092)
Supplement: Supplementary file 1 [file get_supplementary_file.php]

# Supplementary materials

## Raw data of didymin anti-fibrosis's experiments

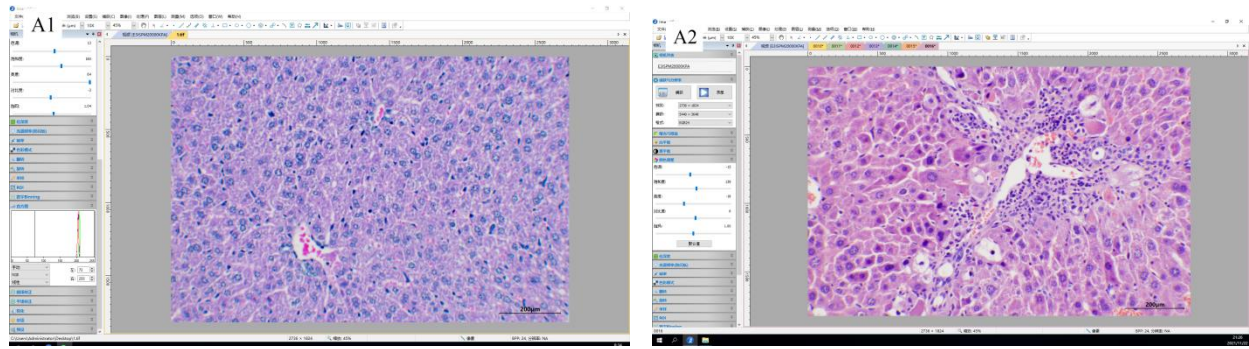

Normal group

Model group

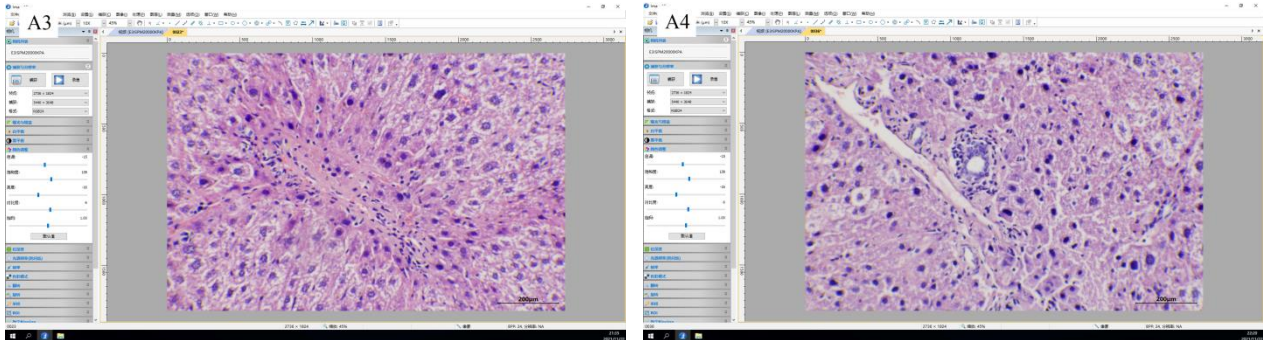

4PBA group

didymin group(2 mg/kg)

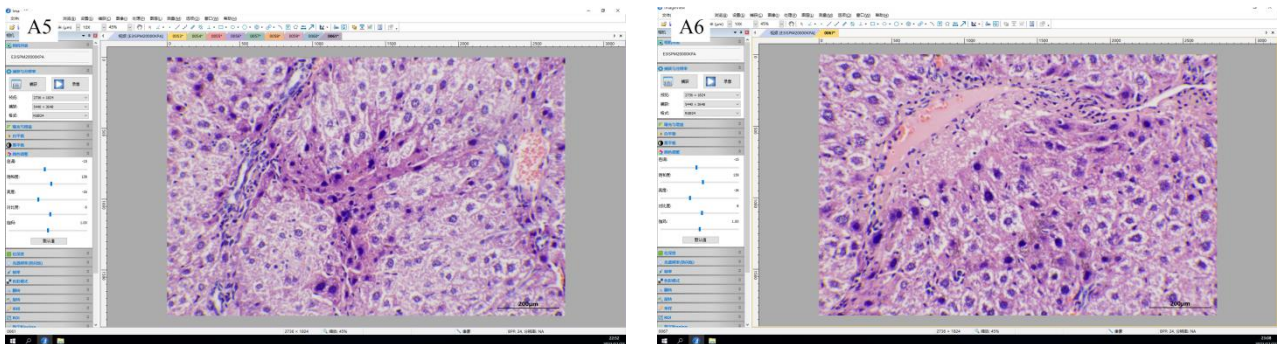

didymin group(1 mg/kg)

didymin group(0.5 mg/kg)

**Fig. S1. The raw data of H&E staining.** The PrintScreen images of H&E staining were captured when the sections were observed under microscope (Olympus CX33 with Image View software, 200×). A1 to A6 represented the normal, model, 4PBA, and didymin group (2, 1, and 0.5 mg/kg), respectively.

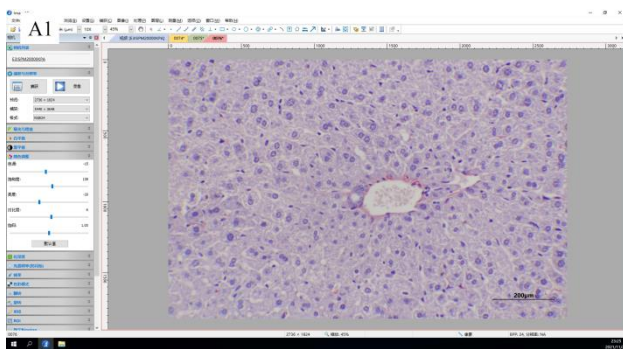

**Normal group**

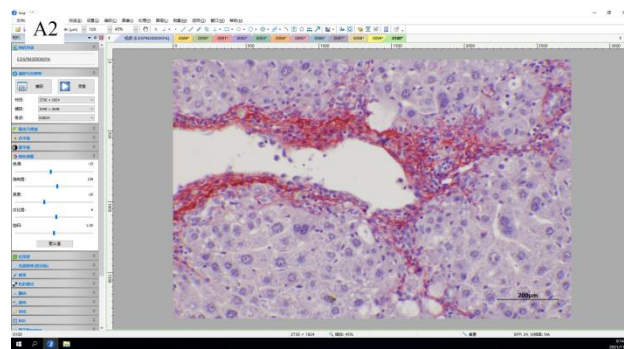

**Model group**

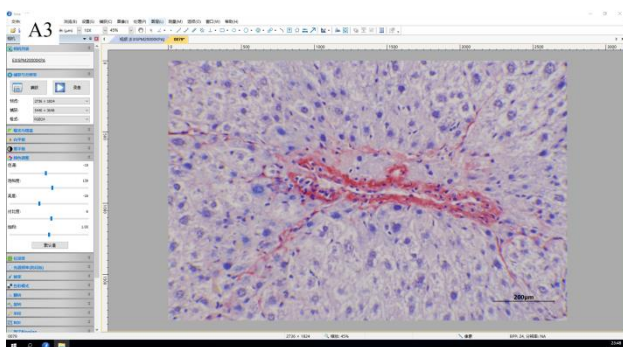

**4PBA group**

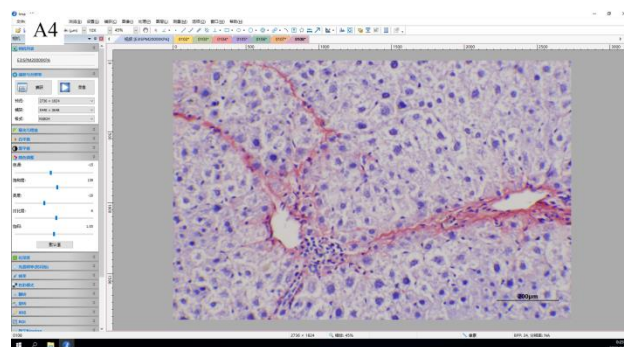

**didymin group(2 mg/kg)**

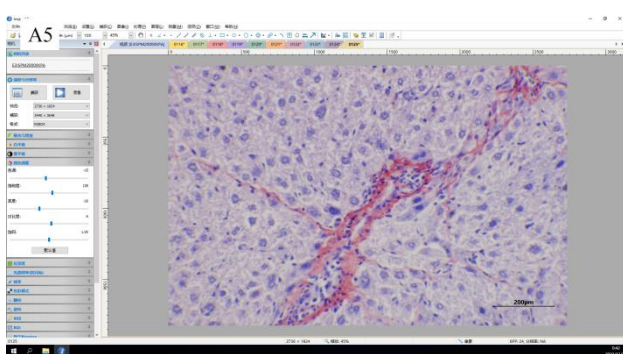

**didymin group(1 mg/kg)**

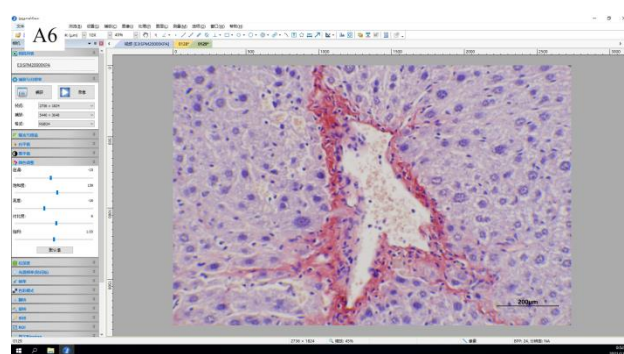

**didymin group(0.5 mg/kg)**

**Fig. S2. The raw data of Sirius staining.** The PrintScreen images of Sirius staining were captured when the sections were observed under microscope (Olympus CX33 with Image View software, 200×). A1 to A6 represented the normal, model, 4PBA, and didymin group (2, 1, and 0.5 mg/kg), respectively.



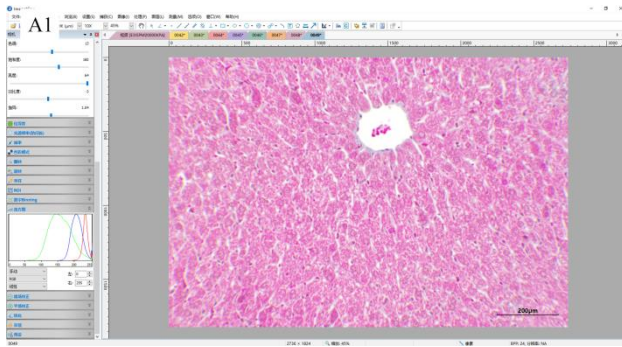

**Normal group**

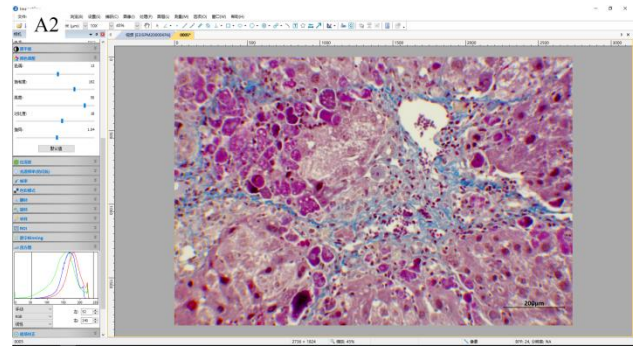

**Model group**

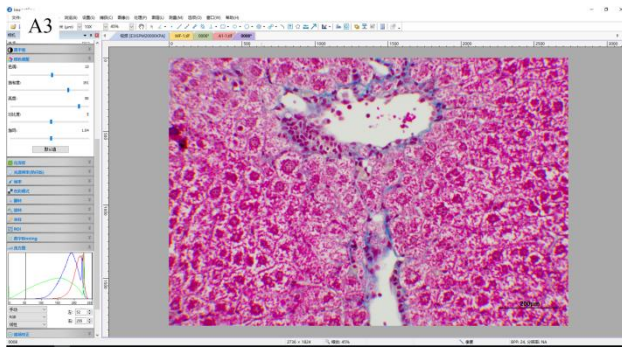

**4PBA group**

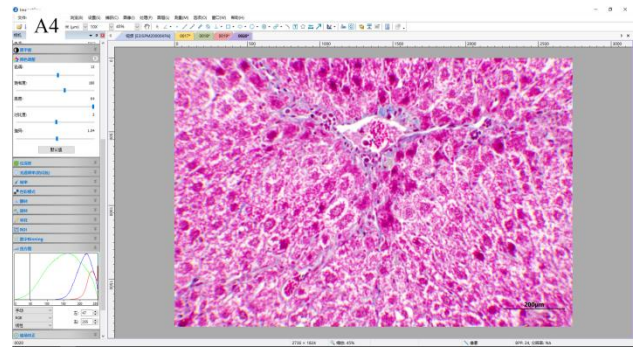

**didymin group(2 mg/kg)**

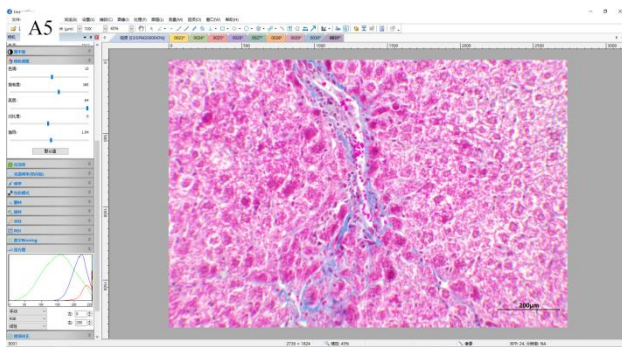

**didymin group(1 mg/kg)**

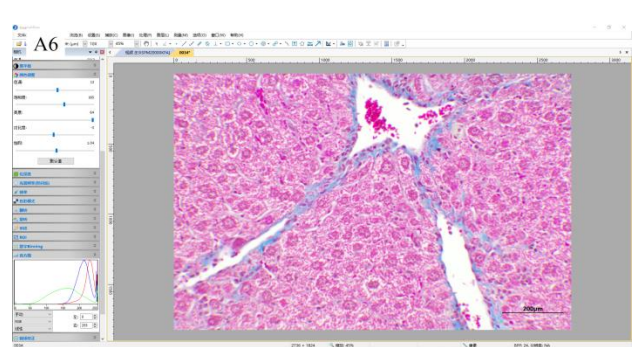

**didymin group(0.5 mg/kg)**

**Fig. S3. The raw data of Masson staining.** The PrintScreen images of Masson staining were captured when the sections were observed under microscope (Olympus CX33 with Image View software, 200×). A1 to A6 represented the normal, model, 4PBA, and didymin group (2, 1, and 0.5 mg/kg), respectively.

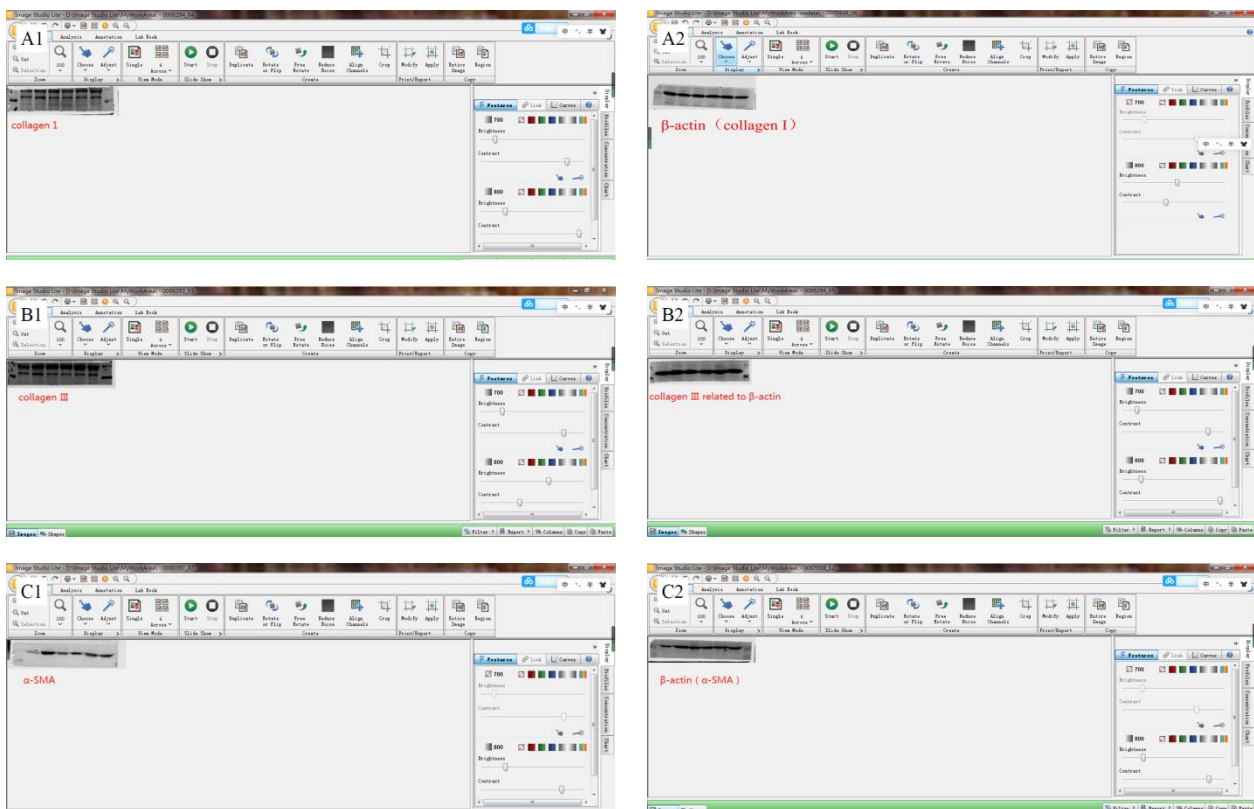

**Fig. S4. The raw data of collagen related proteins.** (A-C) The PrintScreen images of Col-I, Col-III,  $\alpha$ -SMA and corresponding reference protein were captured when the bands were analyzed by Image Studio Lite software. The groups in the bands from left to right are the normal group, model control group, 4PBA group, and didymine-treated groups (2, 1 and 0.5mg/kg).

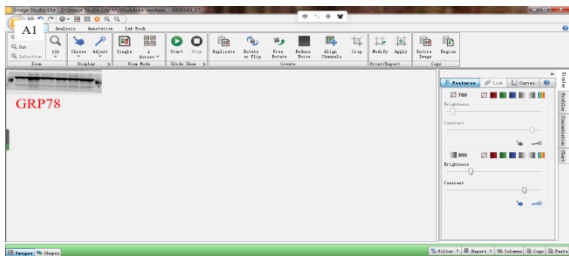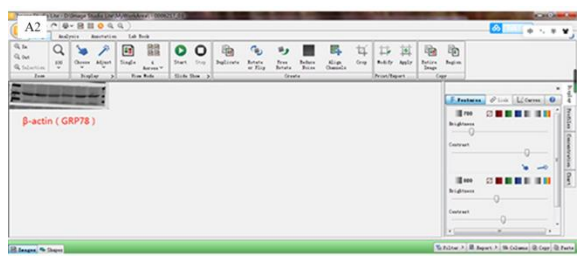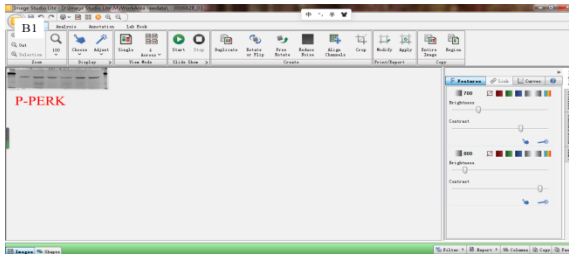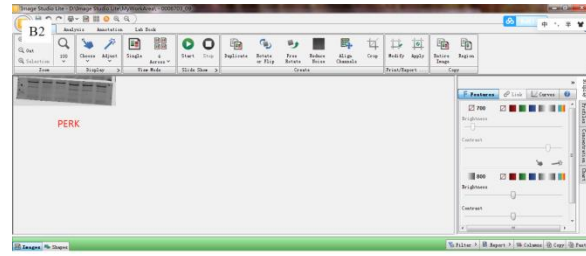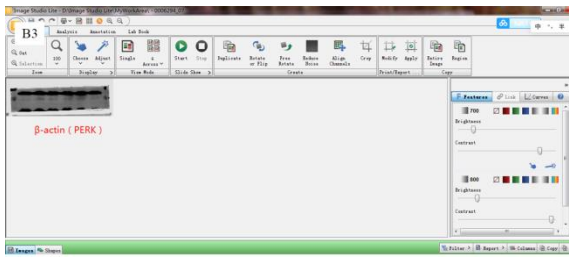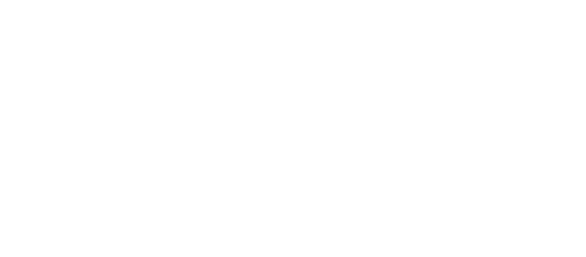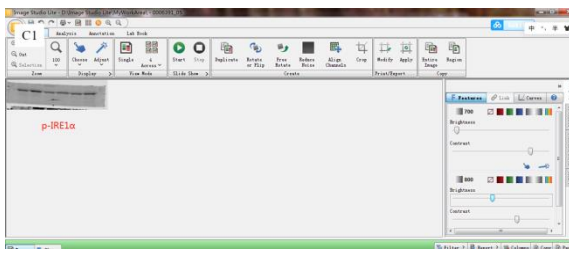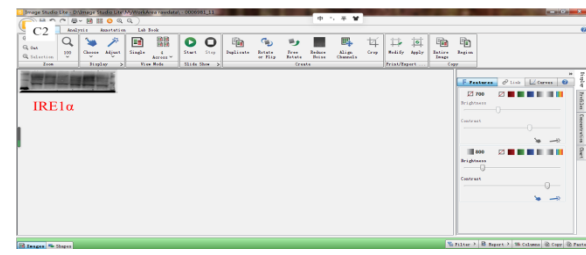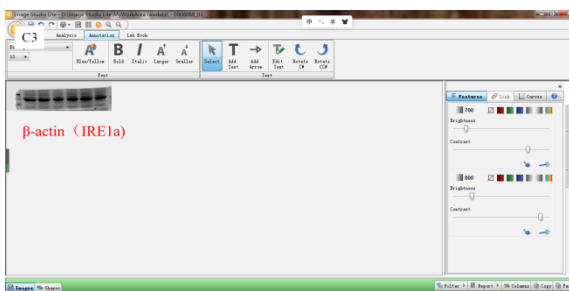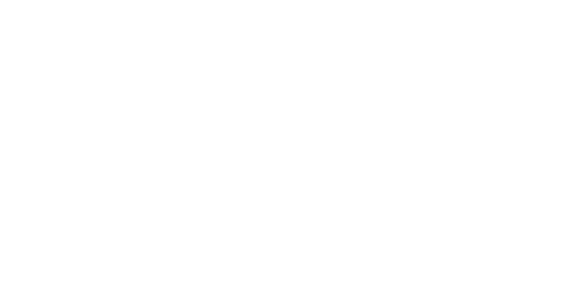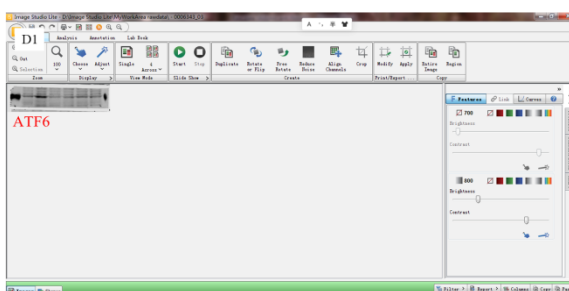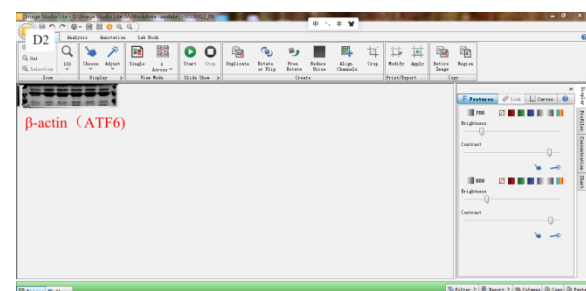

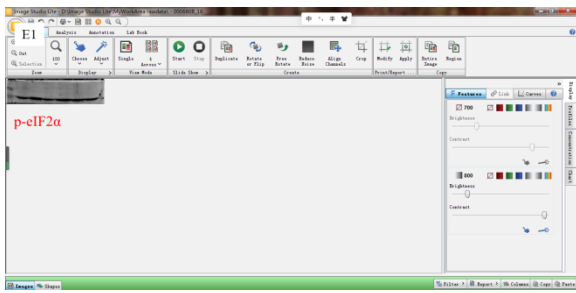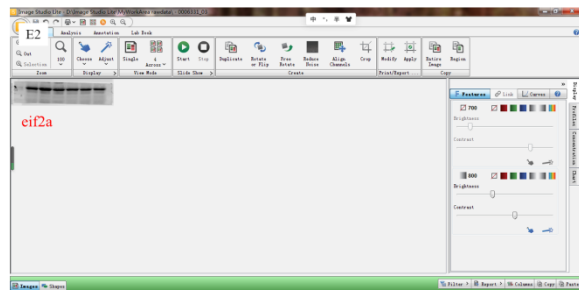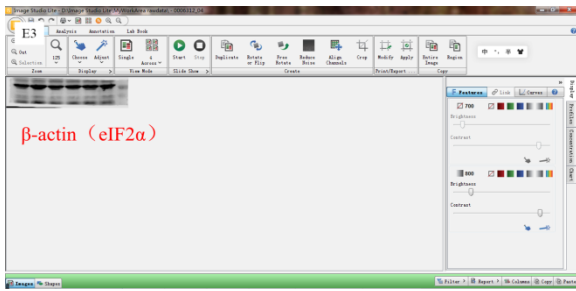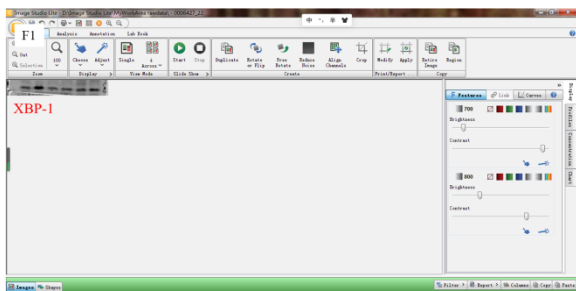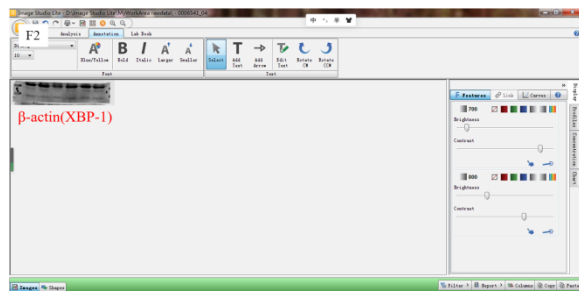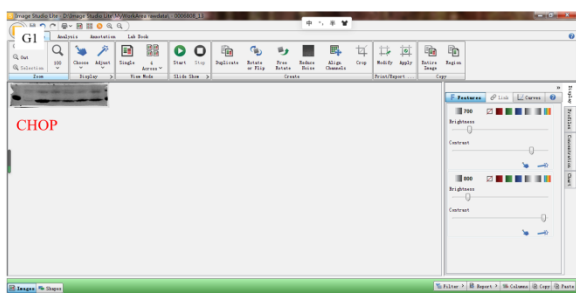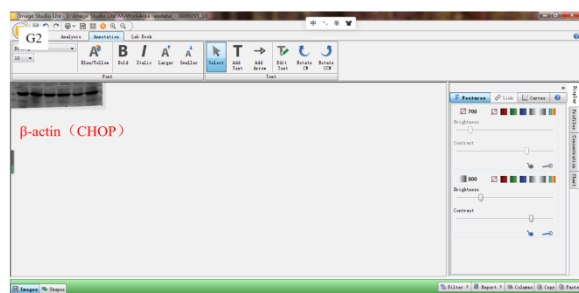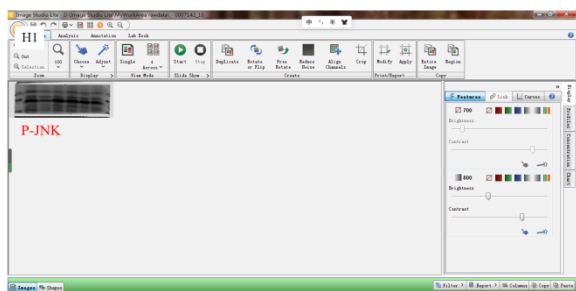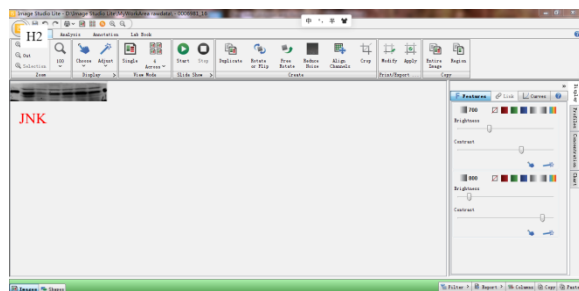

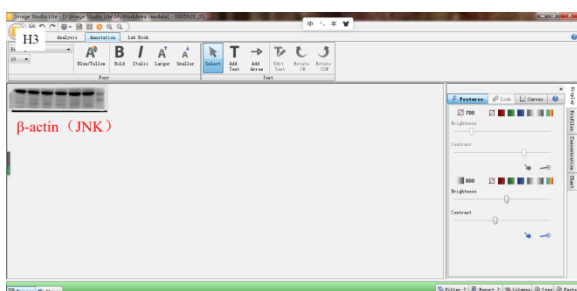

**Fig. S5. The raw data of ERS related proteins.** (A-H) The PrintScreen images of GRP78, PERK, IRE1 $\alpha$ , ATF 6, eIF2 $\alpha$ , XBP-1, CHOP, JNK and corresponding reference protein were captured when the bands were analyzed by Image Studio Lite software. The groups in the bands from left to right are the normal group, model control group, 4PBA group, and didymin-treated groups (2, 1 and 0.5mg/kg).



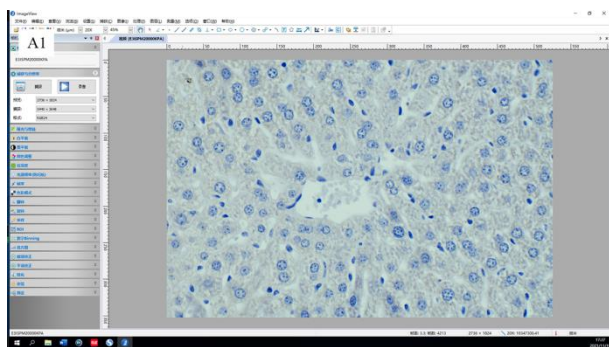

**Normal group**

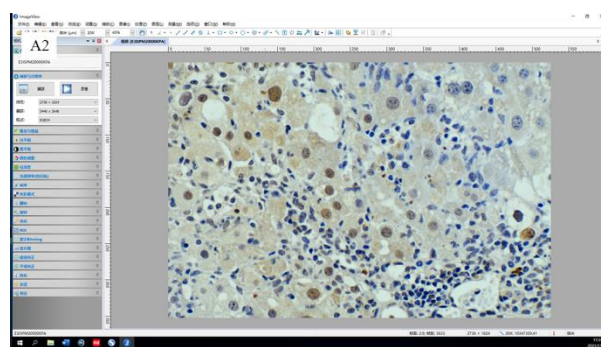

**Model group**

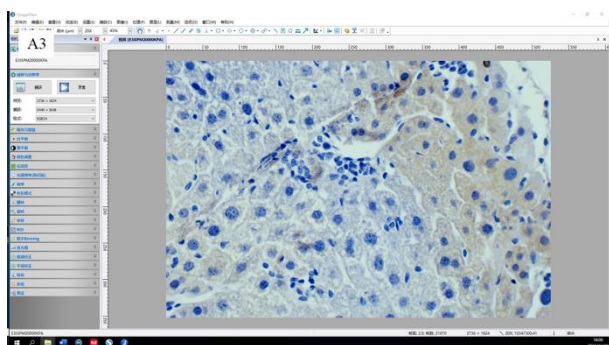

**4PBA group**

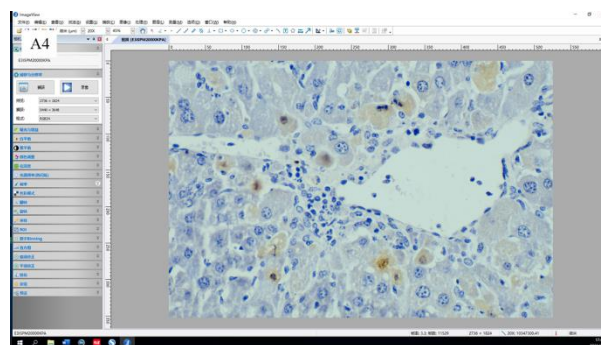

**didymin (2mg/kg)**

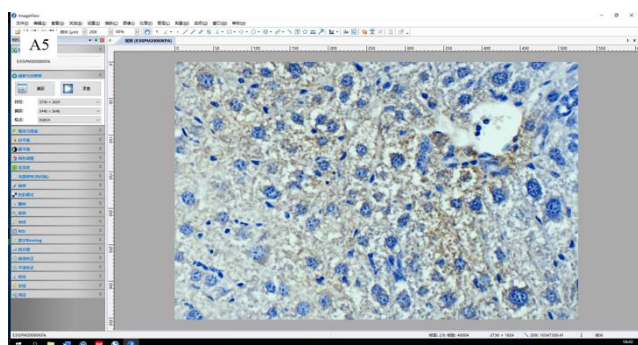

**didymin (1mg/kg)**

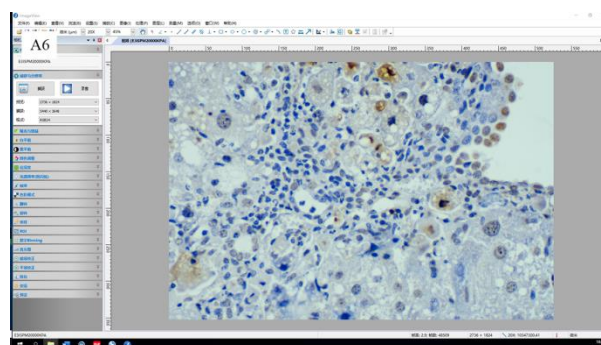

**didymin (0.5mg/kg)**

**Fig. S6. The raw data of TUNEL staining.** The PrintScreen images of TUNEL staining were captured when the sections were observed under microscope (Olympus CX33 with Image View software, 200×). A1 to A6 represented the normal, model, 4PBA, and didymin group (2, 1, and 0.5 mg/kg), respectively.



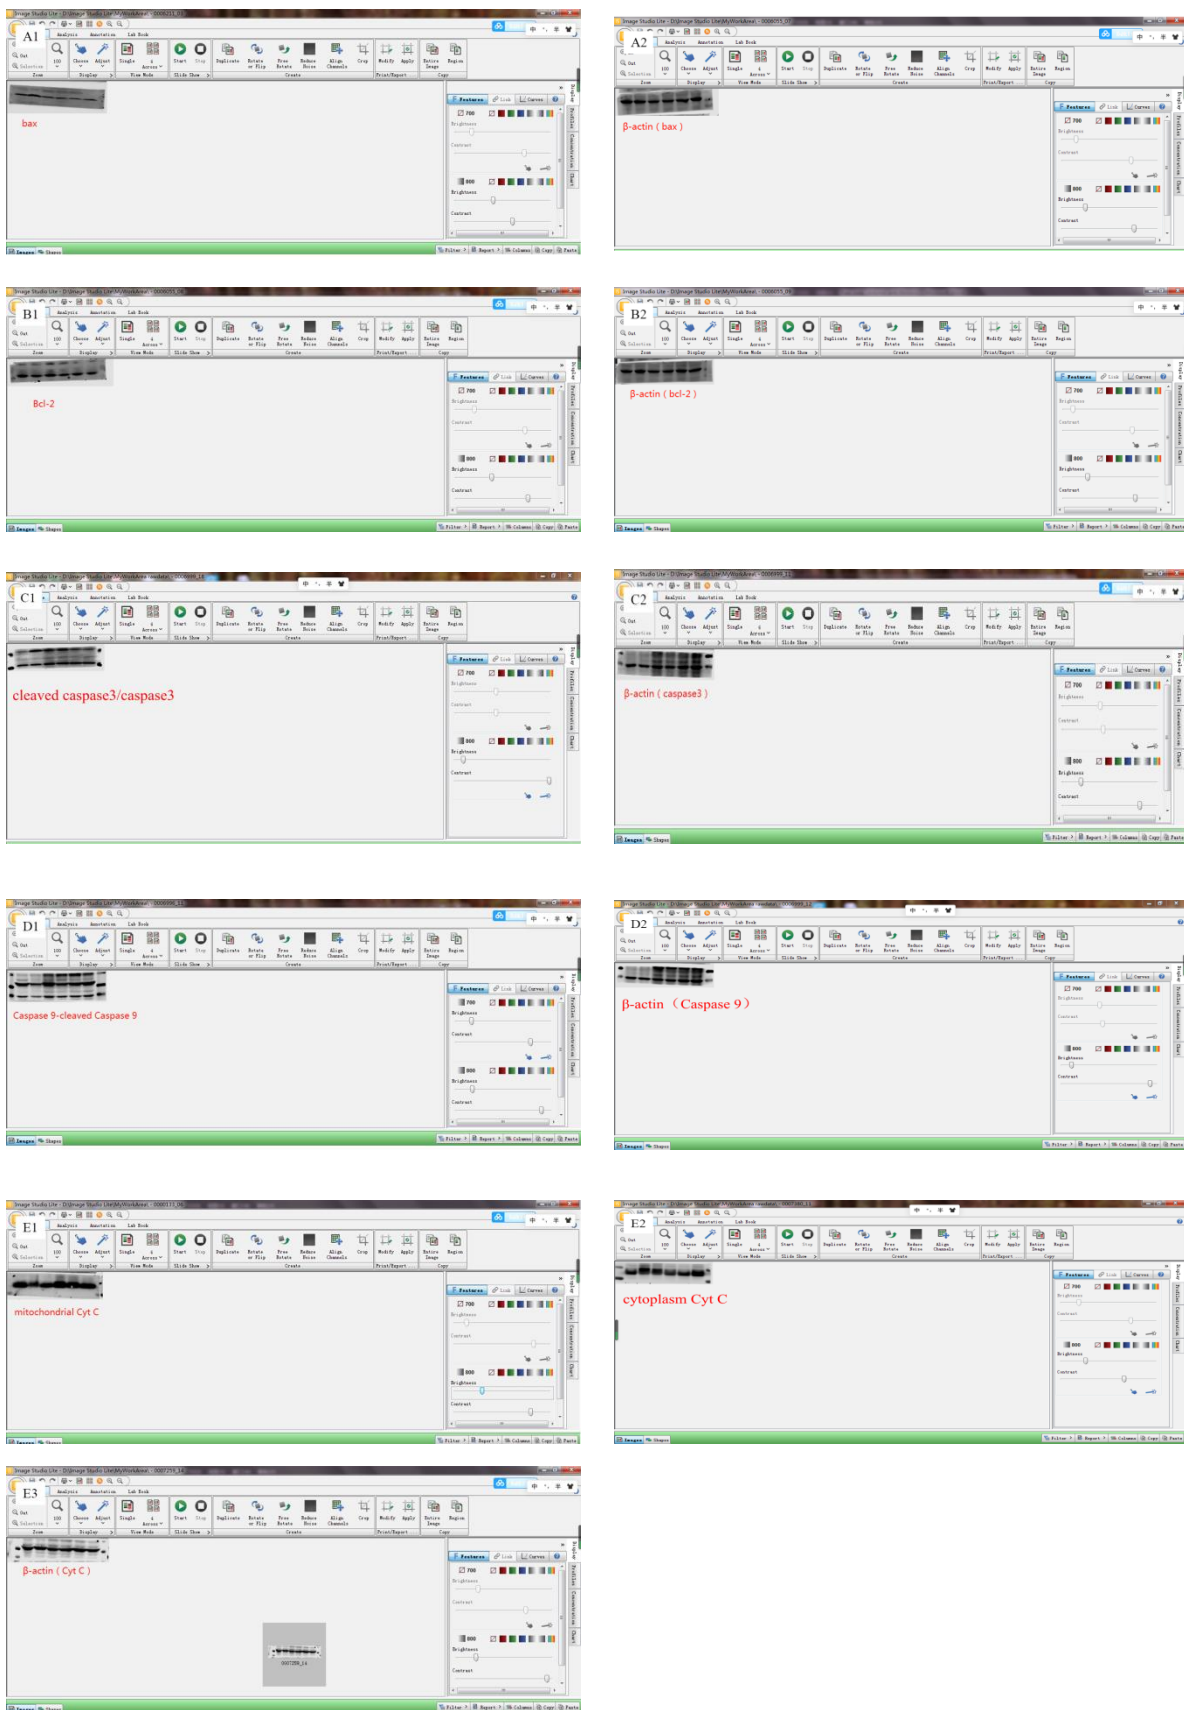

**Fig. S7. The raw data of apoptosis related proteins.** (A-E) The PrintScreen images of Bax, Bcl-2, cleaved caspase3/caspase3, cleaved caspase9/caspase9, Cyt C and corresponding reference protein were captured when

the bands were analyzed by Image Studio Lite software. The groups in the bands from left to right are the normal group, model control group, 4PBA group, and didymin-treated groups (2, 1 and 0.5mg/kg).

Table. S1 Didymn alleviated inflammation and oxidant stress.

| Groups                   | IL-1 $\beta$<br>(ng/mL)        | IL-6<br>(ng/mL)               | NO<br>(umol/g prot)          | iNOS<br>(U/mg prot)            | ROS<br>(ng/mL)                  |
|--------------------------|--------------------------------|-------------------------------|------------------------------|--------------------------------|---------------------------------|
| Normal control group     | 104.68 $\pm$ 2.20              | 15.89 $\pm$ 2.56              | 0.25 $\pm$ 0.08              | 45.63 $\pm$ 7.34               | 409.40 $\pm$ 6.57               |
| Model control group      | 114.59 $\pm$ 3.23 <sup>#</sup> | 41.79 $\pm$ 5.64 <sup>#</sup> | 2.15 $\pm$ 0.23 <sup>#</sup> | 103.28 $\pm$ 5.04 <sup>#</sup> | 547.53 $\pm$ 25.85 <sup>#</sup> |
| 4PBA group (400mg/kg)    | 108.43 $\pm$ 3.41              | 26.27 $\pm$ 2.96 <sup>*</sup> | 0.50 $\pm$ 0.20 <sup>*</sup> | 74.78 $\pm$ 1.99 <sup>*</sup>  | 436.18 $\pm$ 17.14 <sup>*</sup> |
| Didymn group (2mg/kg)    | 110.15 $\pm$ 1.97              | 22.59 $\pm$ 1.65 <sup>*</sup> | 0.58 $\pm$ 0.21 <sup>*</sup> | 54.47 $\pm$ 7.88 <sup>*</sup>  | 406.90 $\pm$ 17.53 <sup>*</sup> |
| Didymn group (1 mg/kg)   | 101.10 $\pm$ 0.53 <sup>*</sup> | 27.92 $\pm$ 2.14              | 0.82 $\pm$ 0.33 <sup>*</sup> | 82.29 $\pm$ 3.72 <sup>*</sup>  | 442.38 $\pm$ 15.57 <sup>*</sup> |
| Didymn group (0.5 mg/kg) | 107.70 $\pm$ 4.13              | 32.32 $\pm$ 1.65              | 1.02 $\pm$ 0.37 <sup>*</sup> | 98.26 $\pm$ 6.33               | 463.90 $\pm$ 16.34 <sup>*</sup> |

<sup>#</sup>P<0.05 VS the normal group and <sup>\*</sup>P<0.05 VS the model group

| Groups                   | SOD<br>(U/mg prot)             | CAT<br>(U/mg prot)            | GSH<br>(mgGSH/L)                |
|--------------------------|--------------------------------|-------------------------------|---------------------------------|
| Normal control group     | 165.45 $\pm$ 14.62             | 86.09 $\pm$ 5.49              | 165.45 $\pm$ 14.62              |
| Model control group      | 119.58 $\pm$ 8.61 <sup>#</sup> | 63.43 $\pm$ 5.06 <sup>#</sup> | 114.97 $\pm$ 20.53 <sup>#</sup> |
| 4PBA group (400mg/kg)    | 143.57 $\pm$ 8.61 <sup>*</sup> | 75.52 $\pm$ 4.50 <sup>*</sup> | 137.92 $\pm$ 5.17               |
| Didymn group (2mg/kg)    | 142.55 $\pm$ 8.22 <sup>*</sup> | 77.72 $\pm$ 6.12 <sup>*</sup> | 143.57 $\pm$ 8.61               |
| Didymn group (1 mg/kg)   | 137.92 $\pm$ 5.17 <sup>*</sup> | 75.12 $\pm$ 4.00 <sup>*</sup> | 142.55 $\pm$ 8.22               |
| Didymn group (0.5 mg/kg) | 122.73 $\pm$ 8.80              | 64.35 $\pm$ 6.81              | 119.58 $\pm$ 8.61               |

<sup>#</sup>P<0.05 VS the normal group and <sup>\*</sup>P<0.05 VS the model group
